# Supplementary material for: Genome-Wide Identification and Expression Profiling of Heavy Metal ATPase (HMA) Genes in Peanut: Potential Roles in Heavy Metal Transport
Source: MDPI journal article supplement (doi:10.3390/ijms25010613), 2024-01-03
Supplement: s1 [file s1]

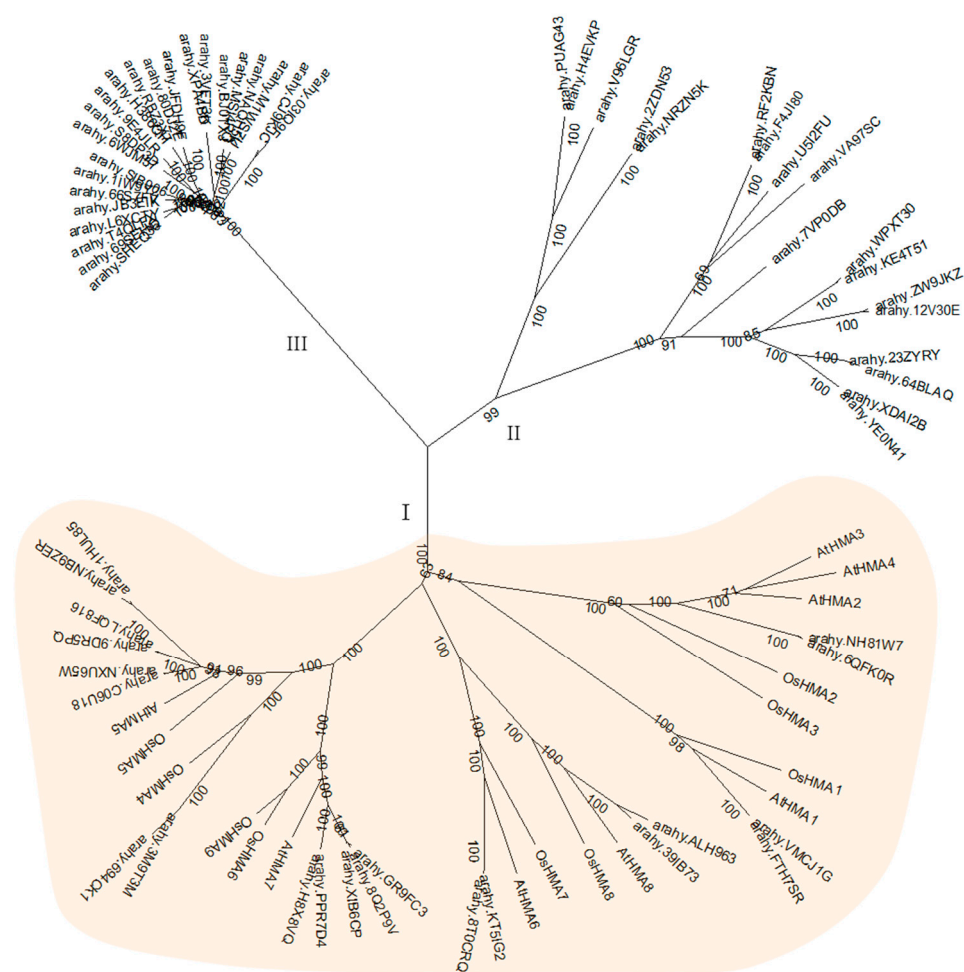

**Figure S1.** Screening HMAs from candidate sequences identified by a BLASTP search against the peanut genome using phylogenetic analysis with AtHMAs from *Arabidopsis* and OsHMAs from rice. A total of 21 protein sequences were identified to be putative AhHMA members (cluster I).

|  |  |  |  |  |  |  |  |  |  |  |  |  |  |  |  |  |  |  |  |  |  |  |  |  |  |  |  |  |  |  |  |  |  |  |  |  |  |  |  |  |  |  |  |  |  |  |  |  |  |  |  |  |  |  |  |  |  |  |  |  |  |  |  |  |  |  |  |  |  |  |  |  |  |  |  |  |  |  |  |  |  |  |  |  |  |  |  |  |  |  |  |  |  |  |  |  |  |  |  |  |  |  |  |  |  |  |  |  |  |  |  |  |  |  |  |  |  |  |  |  |  |  |  |  |  |  |  |  |  |  |  |  |  |  |  |  |  |  |  |  |  |  |  |  |  |  |  |  |  |  |  |  |  |  |  |  |  |  |  |  |  |  |  |  |  |  |  |  |  |  |  |  |  |  |  |  |  |  |  |  |  |  |  |  |  |  |  |  |  |  |  |  |  |  |  |  |  |  |  |  |  |  |  |  |  |  |  |  |  |  |  |  |  |  |  |  |  |  |  |  |  |  |  |  |  |  |  |  |  |  |  |  |  |  |  |  |  |  |  |  |  |  |  |  |  |  |  |  |  |  |  |  |  |  |  |  |  |  |  |  |  |  |  |  |  |  |  |  |  |  |  |  |  |  |  |  |  |  |  |  |  |  |  |  |  |  |  |  |  |  |  |  |  |  |  |  |  |  |  |  |  |  |  |  |  |  |  |  |  |  |  |  |  |  |  |  |  |  |  |  |  |  |  |  |  |  |  |  |  |  |  |  |  |  |  |  |  |  |  |  |  |  |  |  |  |  |  |  |  |  |  |  |  |  |  |  |  |  |  |  |  |  |  |  |  |  |  |  |  |  |  |  |  |  |  |  |  |  |  |  |  |  |  |  |  |  |  |  |  |  |  |  |  |  |  |  |  |  |  |  |  |  |  |  |  |  |  |  |  |  |  |  |  |  |  |  |  |  |  |  |  |  |  |  |  |  |  |  |  |  |  |  |  |  |  |  |  |  |  |  |  |  |  |  |  |  |  |  |  |  |  |  |  |  |  |  |  |  |  |  |  |  |  |  |  |  |  |  |  |  |  |  |  |  |  |  |  |  |  |  |  |  |  |  |  |  |  |  |  |  |  |  |  |  |  |  |  |  |  |  |  |  |  |  |  |  |  |  |  |  |  |  |  |  |  |  |  |  |  |  |  |  |  |  |  |  |  |  |  |  |  |  |  |  |  |  |  |  |  |  |  |  |  |  |  |  |  |  |  |  |  |  |  |  |  |  |  |  |  |  |  |  |  |  |  |  |  |  |  |  |  |  |  |  |  |  |  |  |  |  |  |  |  |  |  |  |  |  |  |  |  |  |  |  |  |  |  |  |  |  |  |  |  |  |  |  |  |  |  |  |  |  |  |  |  |  |  |  |  |  |  |  |  |  |  |  |  |  |  |  |  |  |  |  |  |  |  |  |  |  |  |  |  |  |  |  |  |  |  |  |  |  |  |  |  |  |  |  |  |  |  |  |  |  |  |  |  |  |  |  |  |  |  |  |  |  |  |  |  |  |  |  |  |  |  |  |  |  |  |  |  |  |  |  |  |  |  |  |  |  |  |  |  |  |  |  |  |  |  |  |  |  |  |  |  |  |  |  |  |  |  |  |  |  |  |  |  |  |  |  |  |  |  |  |  |  |  |  |  |  |  |  |  |  |  |  |  |  |  |  |  |  |  |  |  |  |  |  |  |  |  |  |  |  |  |  |  |  |  |  |  |  |  |  |  |  |  |  |  |  |  |  |  |  |  |  |  |  |  |  |  |  |  |  |  |  |  |  |  |  |  |  |  |  |  |  |  |  |  |  |  |  |  |  |  |  |  |  |  |  |  |  |  |  |  |  |  |  |  |  |  |  |  |  |  |  |  |  |  |  |  |  |  |  |  |  |  |  |  |  |  |  |  |  |  |  |  |  |  |  |  |  |  |  |  |  |  |  |  |  |  |  |  |  |  |  |  |  |  |  |  |  |  |  |  |  |  |  |  |  |  |  |  |  |  |  |  |  |  |  |  |  |  |  |  |  |  |  |  |  |  |  |  |  |  |  |  |  |  |  |  |  |  |  |  |  |  |  |  |  |  |  |  |  |  |  |  |  |  |  |  |  |  |  |  |  |  |  |  |  |  |  |  |  |  |  |  |  |  |  |  |  |  |  |  |  |  |  |  |  |  |  |  |  |  |  |  |  |  |  |  |  |  |  |  |  |  |  |  |  |  |  |  |  |  |  |  |  |  |  |  |  |  |  |  |  |  |  |  |  |  |  |  |  |  |  |  |  |  |  |  |  |  |  |  |  |  |  |  |  |  |  |  |  |  |  |  |  |  |  |  |  |  |  |  |  |  |  |  |  |  |  |  |  |  |  |  |  |  |  |  |  |  |  |  |  |  |  |  |  |  |  |  |  |  |  |  |  |  |  |  |  |  |  |  |  |  |  |  |  |  |  |  |  |  |  |  |  |  |  |  |  |  |  |  |  |  |  |  |  |  |  |  |  |  |  |  |  |  |  |  |  |  |  |  |  |  |  |  |  |  |  |  |  |  |  |  |  |  |  |  |  |  |  |  |  |  |  |  |  |  |  |  |  |  |  |  |  |  |  |  |  |  |  |  |  |  |  |  |  |  |  |  |  |  |  |  |  |  |  |  |  |  |  |  |  |  |  |  |  |  |  |  |  |  |  |  |  |  |  |  |  |  |  |  |  |  |  |  |  |  |  |  |  |  |  |  |  |  |  |  |  |  |  |  |  |  |  |  |  |  |  |  |  |  |  |  |  |  |  |  |  |  |  |  |  |  |  |  |  |  |  |  |  |  |  |  |  |  |  |  |  |  |  |  |  |  |  |  |  |  |  |  |  |  |  |  |  |  |  |  |  |  |  |  |  |  |  |  |  |  |  |  |  |  |  |  |  |  |  |  |  |  |  |  |  |  |  |  |  |  |  |  |  |  |  |  |  |  |  |  |  |  |  |  |  |  |  |  |  |  |  |  |  |  |  |  |  |  |  |  |  |  |  |  |  |  |  |  |  |  |  |  |  |  |  |  |  |  |  |  |  |  |  |  |  |  |  |  |  |  |  |  |  |  |  |  |  |  |  |  |  |  |  |  |  |  |  |  |  |  |  |  |  |  |  |  |  |  |  |  |  |  |  |  |  |  |  |  |  |  |  |  |  |  |  |  |  |  |  |  |  |  |  |  |  |  |  |  |  |  |  |  |  |  |  |  |  |  |  |  |  |  |  |  |  |  |  |  |  |  |  |  |  |  |  |  |  |  |  |  |  |  |  |  |  |  |  |  |  |  |  |  |  |  |  |  |  |  |  |  |  |  |  |  |  |  |  |  |  |  |  |  |  |
|--|--|--|--|--|--|--|--|--|--|--|--|--|--|--|--|--|--|--|--|--|--|--|--|--|--|--|--|--|--|--|--|--|--|--|--|--|--|--|--|--|--|--|--|--|--|--|--|--|--|--|--|--|--|--|--|--|--|--|--|--|--|--|--|--|--|--|--|--|--|--|--|--|--|--|--|--|--|--|--|--|--|--|--|--|--|--|--|--|--|--|--|--|--|--|--|--|--|--|--|--|--|--|--|--|--|--|--|--|--|--|--|--|--|--|--|--|--|--|--|--|--|--|--|--|--|--|--|--|--|--|--|--|--|--|--|--|--|--|--|--|--|--|--|--|--|--|--|--|--|--|--|--|--|--|--|--|--|--|--|--|--|--|--|--|--|--|--|--|--|--|--|--|--|--|--|--|--|--|--|--|--|--|--|--|--|--|--|--|--|--|--|--|--|--|--|--|--|--|--|--|--|--|--|--|--|--|--|--|--|--|--|--|--|--|--|--|--|--|--|--|--|--|--|--|--|--|--|--|--|--|--|--|--|--|--|--|--|--|--|--|--|--|--|--|--|--|--|--|--|--|--|--|--|--|--|--|--|--|--|--|--|--|--|--|--|--|--|--|--|--|--|--|--|--|--|--|--|--|--|--|--|--|--|--|--|--|--|--|--|--|--|--|--|--|--|--|--|--|--|--|--|--|--|--|--|--|--|--|--|--|--|--|--|--|--|--|--|--|--|--|--|--|--|--|--|--|--|--|--|--|--|--|--|--|--|--|--|--|--|--|--|--|--|--|--|--|--|--|--|--|--|--|--|--|--|--|--|--|--|--|--|--|--|--|--|--|--|--|--|--|--|--|--|--|--|--|--|--|--|--|--|--|--|--|--|--|--|--|--|--|--|--|--|--|--|--|--|--|--|--|--|--|--|--|--|--|--|--|--|--|--|--|--|--|--|--|--|--|--|--|--|--|--|--|--|--|--|--|--|--|--|--|--|--|--|--|--|--|--|--|--|--|--|--|--|--|--|--|--|--|--|--|--|--|--|--|--|--|--|--|--|--|--|--|--|--|--|--|--|--|--|--|--|--|--|--|--|--|--|--|--|--|--|--|--|--|--|--|--|--|--|--|--|--|--|--|--|--|--|--|--|--|--|--|--|--|--|--|--|--|--|--|--|--|--|--|--|--|--|--|--|--|--|--|--|--|--|--|--|--|--|--|--|--|--|--|--|--|--|--|--|--|--|--|--|--|--|--|--|--|--|--|--|--|--|--|--|--|--|--|--|--|--|--|--|--|--|--|--|--|--|--|--|--|--|--|--|--|--|--|--|--|--|--|--|--|--|--|--|--|--|--|--|--|--|--|--|--|--|--|--|--|--|--|--|--|--|--|--|--|--|--|--|--|--|--|--|--|--|--|--|--|--|--|--|--|--|--|--|--|--|--|--|--|--|--|--|--|--|--|--|--|--|--|--|--|--|--|--|--|--|--|--|--|--|--|--|--|--|--|--|--|--|--|--|--|--|--|--|--|--|--|--|--|--|--|--|--|--|--|--|--|--|--|--|--|--|--|--|--|--|--|--|--|--|--|--|--|--|--|--|--|--|--|--|--|--|--|--|--|--|--|--|--|--|--|--|--|--|--|--|--|--|--|--|--|--|--|--|--|--|--|--|--|--|--|--|--|--|--|--|--|--|--|--|--|--|--|--|--|--|--|--|--|--|--|--|--|--|--|--|--|--|--|--|--|--|--|--|--|--|--|--|--|--|--|--|--|--|--|--|--|--|--|--|--|--|--|--|--|--|--|--|--|--|--|--|--|--|--|--|--|--|--|--|--|--|--|--|--|--|--|--|--|--|--|--|--|--|--|--|--|--|--|--|--|--|--|--|--|--|--|--|--|--|--|--|--|--|--|--|--|--|--|--|--|--|--|--|--|--|--|--|--|--|--|--|--|--|--|--|--|--|--|--|--|--|--|--|--|--|--|--|--|--|--|--|--|--|--|--|--|--|--|--|--|--|--|--|--|--|--|--|--|--|--|--|--|--|--|--|--|--|--|--|--|--|--|--|--|--|--|--|--|--|--|--|--|--|--|--|--|--|--|--|--|--|--|--|--|--|--|--|--|--|--|--|--|--|--|--|--|--|--|--|--|--|--|--|--|--|--|--|--|--|--|--|--|--|--|--|--|--|--|--|--|--|--|--|--|--|--|--|--|--|--|--|--|--|--|--|--|--|--|--|--|--|--|--|--|--|--|--|--|--|--|--|--|--|--|--|--|--|--|--|--|--|--|--|--|--|--|--|--|--|--|--|--|--|--|--|--|--|--|--|--|--|--|--|--|--|--|--|--|--|--|--|--|--|--|--|--|--|--|--|--|--|--|--|--|--|--|--|--|--|--|--|--|--|--|--|--|--|--|--|--|--|--|--|--|--|--|--|--|--|--|--|--|--|--|--|--|--|--|--|--|--|--|--|--|--|--|--|--|--|--|--|--|--|--|--|--|--|--|--|--|--|--|--|--|--|--|--|--|--|--|--|--|--|--|--|--|--|--|--|--|--|--|--|--|--|--|--|--|--|--|--|--|--|--|--|--|--|--|--|--|--|--|--|--|--|--|--|--|--|--|--|--|--|--|--|--|--|--|--|--|--|--|--|--|--|--|--|--|--|--|--|--|--|--|--|--|--|--|--|--|--|--|--|--|--|--|--|--|--|--|--|--|--|--|--|--|--|--|--|--|--|--|--|--|--|--|--|--|--|--|--|--|--|--|--|--|--|--|--|--|--|--|--|--|--|--|--|--|--|--|--|--|--|--|--|--|--|--|--|--|--|--|--|--|--|--|--|--|--|--|--|--|--|--|--|--|--|--|--|--|--|--|--|--|--|--|--|--|--|--|--|--|--|--|--|--|--|--|--|--|--|--|--|--|--|--|--|--|--|--|--|--|--|--|--|--|--|--|--|--|--|--|--|--|--|--|--|--|--|--|--|--|--|--|--|--|--|--|--|--|--|--|--|--|--|--|--|--|--|--|--|--|--|--|--|--|--|--|--|--|--|--|--|--|--|--|--|--|--|--|--|--|--|--|--|--|--|--|--|--|--|--|--|--|--|--|--|--|--|--|--|--|--|--|--|--|--|--|--|--|--|--|--|--|--|--|--|--|--|--|--|--|--|--|--|--|--|--|--|--|--|--|--|--|--|--|--|--|--|--|--|--|--|--|--|--|--|--|--|--|--|--|--|--|--|--|--|--|--|--|--|--|--|--|--|--|--|--|--|--|--|--|--|--|--|--|--|--|--|--|--|--|--|--|--|--|--|--|--|--|--|--|--|--|--|--|--|--|--|--|--|--|--|--|--|--|--|--|--|--|--|--|--|--|--|--|--|--|
|  |  |  |  |  |  |  |  |  |  |  |  |  |  |  |  |  |  |  |  |  |  |  |  |  |  |  |  |  |  |  |  |  |  |  |  |  |  |  |  |  |  |  |  |  |  |  |  |  |  |  |  |  |  |  |  |  |  |  |  |  |  |  |  |  |  |  |  |  |  |  |  |  |  |  |  |  |  |  |  |  |  |  |  |  |  |  |  |  |  |  |  |  |  |  |  |  |  |  |  |  |  |  |  |  |  |  |  |  |  |  |  |  |  |  |  |  |  |  |  |  |  |  |  |  |  |  |  |  |  |  |  |  |  |  |  |  |  |  |  |  |  |  |  |  |  |  |  |  |  |  |  |  |  |  |  |  |  |  |  |  |  |  |  |  |  |  |  |  |  |  |  |  |  |  |  |  |  |  |  |  |  |  |  |  |  |  |  |  |  |  |  |  |  |  |  |  |  |  |  |  |  |  |  |  |  |  |  |  |  |  |  |  |  |  |  |  |  |  |  |  |  |  |  |  |  |  |  |  |  |  |  |  |  |  |  |  |  |  |  |  |  |  |  |  |  |  |  |  |  |  |  |  |  |  |  |  |  |  |  |  |  |  |  |  |  |  |  |  |  |  |  |  |  |  |  |  |  |  |  |  |  |  |  |  |  |  |  |  |  |  |  |  |  |  |  |  |  |  |  |  |  |  |  |  |  |  |  |  |  |  |  |  |  |  |  |  |  |  |  |  |  |  |  |  |  |  |  |  |  |  |  |  |  |  |  |  |  |  |  |  |  |  |  |  |  |  |  |  |  |  |  |  |  |  |  |  |  |  |  |  |  |  |  |  |  |  |  |  |  |  |  |  |  |  |  |  |  |  |  |  |  |  |  |  |  |  |  |  |  |  |  |  |  |  |  |  |  |  |  |  |  |  |  |  |  |  |  |  |  |  |  |  |  |  |  |  |  |  |  |  |  |  |  |  |  |  |  |  |  |  |  |  |  |  |  |  |  |  |  |  |  |  |  |  |  |  |  |  |  |  |  |  |  |  |  |  |  |  |  |  |  |  |  |  |  |  |  |  |  |  |  |  |  |  |  |  |  |  |  |  |  |  |  |  |  |  |  |  |  |  |  |  |  |  |  |  |  |  |  |  |  |  |  |  |  |  |  |  |  |  |  |  |  |  |  |  |  |  |  |  |  |  |  |  |  |  |  |  |  |  |  |  |  |  |  |  |  |  |  |  |  |  |  |  |  |  |  |  |  |  |  |  |  |  |  |  |  |  |  |  |  |  |  |  |  |  |  |  |  |  |  |  |  |  |  |  |  |  |  |  |  |  |  |  |  |  |  |  |  |  |  |  |  |  |  |  |  |  |  |  |  |  |  |  |  |  |  |  |  |  |  |  |  |  |  |  |  |  |  |  |  |  |  |  |  |  |  |  |  |  |  |  |  |  |  |  |  |  |  |  |  |  |  |  |  |  |  |  |  |  |  |  |  |  |  |  |  |  |  |  |  |  |  |  |  |  |  |  |  |  |  |  |  |  |  |  |  |  |  |  |  |  |  |  |  |  |  |  |  |  |  |  |  |  |  |  |  |  |  |  |  |  |  |  |  |  |  |  |  |  |  |  |  |  |  |  |  |  |  |  |  |  |  |  |  |  |  |  |  |  |  |  |  |  |  |  |  |  |  |  |  |  |  |  |  |  |  |  |  |  |  |  |  |  |  |  |  |  |  |  |  |  |  |  |  |  |  |  |  |  |  |  |  |  |  |  |  |  |  |  |  |  |  |  |  |  |  |  |  |  |  |  |  |  |  |  |  |  |  |  |  |  |  |  |  |  |  |  |  |  |  |  |  |  |  |  |  |  |  |  |  |  |  |  |  |  |  |  |  |  |  |  |  |  |  |  |  |  |  |  |  |  |  |  |  |  |  |  |  |  |  |  |  |  |  |  |  |  |  |  |  |  |  |  |  |  |  |  |  |  |  |  |  |  |  |  |  |  |  |  |  |  |  |  |  |  |  |  |  |  |  |  |  |  |  |  |  |  |  |  |  |  |  |  |  |  |  |  |  |  |  |  |  |  |  |  |  |  |  |  |  |  |  |  |  |  |  |  |  |  |  |  |  |  |  |  |  |  |  |  |  |  |  |  |  |  |  |  |  |  |  |  |  |  |  |  |  |  |  |  |  |  |  |  |  |  |  |  |  |  |  |  |  |  |  |  |  |  |  |  |  |  |  |  |  |  |  |  |  |  |  |  |  |  |  |  |  |  |  |  |  |  |  |  |  |  |  |  |  |  |  |  |  |  |  |  |  |  |  |  |  |  |  |  |  |  |  |  |  |  |  |  |  |  |  |  |  |  |  |  |  |  |  |  |  |  |  |  |  |  |  |  |  |  |  |  |  |  |  |  |  |  |  |  |  |  |  |  |  |  |  |  |  |  |  |  |  |  |  |  |  |  |  |  |  |  |  |  |  |  |  |  |  |  |  |  |  |  |  |  |  |  |  |  |  |  |  |  |  |  |  |  |  |  |  |  |  |  |  |  |  |  |  |  |  |  |  |  |  |  |  |  |  |  |  |  |  |  |  |  |  |  |  |  |  |  |  |  |  |  |  |  |  |  |  |  |  |  |  |  |  |  |  |  |  |  |  |  |  |  |  |  |  |  |  |  |  |  |  |  |  |  |  |  |  |  |  |  |  |  |  |  |  |  |  |  |  |  |  |  |  |  |  |  |  |  |  |  |  |  |  |  |  |  |  |  |  |  |  |  |  |  |  |  |  |  |  |  |  |  |  |  |  |  |  |  |  |  |  |  |  |  |  |  |  |  |  |  |  |  |  |  |  |  |  |  |  |  |  |  |  |  |  |  |  |  |  |  |  |  |  |  |  |  |  |  |  |  |  |  |  |  |  |  |  |  |  |  |  |  |  |  |  |  |  |  |  |  |  |  |  |  |  |  |  |  |  |  |  |  |  |  |  |  |  |  |  |  |  |  |  |  |  |  |  |  |  |  |  |  |  |  |  |  |  |  |  |  |  |  |  |  |  |  |  |  |  |  |  |  |  |  |  |  |  |  |  |  |  |  |  |  |  |  |  |  |  |  |  |  |  |  |  |  |  |  |  |  |  |  |  |  |  |  |  |  |  |  |  |  |  |  |  |  |  |  |  |  |  |  |  |  |  |  |  |  |  |  |  |  |  |  |  |  |  |  |  |  |  |  |  |  |  |  |  |  |  |  |  |  |  |  |  |  |  |  |  |  |  |  |  |  |  |  |  |  |  |  |  |  |  |  |  |  |  |  |  |  |  |  |  |  |  |  |  |  |  |  |  |  |  |  |  |  |  |  |  |  |  |  |  |  |  |  |  |  |  |  |  |  |  |  |  |  |
|--|--|--|--|--|--|--|--|--|--|--|--|--|--|--|--|--|--|--|--|--|--|--|--|--|--|--|--|--|--|--|--|--|--|--|--|--|--|--|--|--|--|--|--|--|--|--|--|--|--|--|--|--|--|--|--|--|--|--|--|--|--|--|--|--|--|--|--|--|--|--|--|--|--|--|--|--|--|--|--|--|--|--|--|--|--|--|--|--|--|--|--|--|--|--|--|--|--|--|--|--|--|--|--|--|--|--|--|--|--|--|--|--|--|--|--|--|--|--|--|--|--|--|--|--|--|--|--|--|--|--|--|--|--|--|--|--|--|--|--|--|--|--|--|--|--|--|--|--|--|--|--|--|--|--|--|--|--|--|--|--|--|--|--|--|--|--|--|--|--|--|--|--|--|--|--|--|--|--|--|--|--|--|--|--|--|--|--|--|--|--|--|--|--|--|--|--|--|--|--|--|--|--|--|--|--|--|--|--|--|--|--|--|--|--|--|--|--|--|--|--|--|--|--|--|--|--|--|--|--|--|--|--|--|--|--|--|--|--|--|--|--|--|--|--|--|--|--|--|--|--|--|--|--|--|--|--|--|--|--|--|--|--|--|--|--|--|--|--|--|--|--|--|--|--|--|--|--|--|--|--|--|--|--|--|--|--|--|--|--|--|--|--|--|--|--|--|--|--|--|--|--|--|--|--|--|--|--|--|--|--|--|--|--|--|--|--|--|--|--|--|--|--|--|--|--|--|--|--|--|--|--|--|--|--|--|--|--|--|--|--|--|--|--|--|--|--|--|--|--|--|--|--|--|--|--|--|--|--|--|--|--|--|--|--|--|--|--|--|--|--|--|--|--|--|--|--|--|--|--|--|--|--|--|--|--|--|--|--|--|--|--|--|--|--|--|--|--|--|--|--|--|--|--|--|--|--|--|--|--|--|--|--|--|--|--|--|--|--|--|--|--|--|--|--|--|--|--|--|--|--|--|--|--|--|--|--|--|--|--|--|--|--|--|--|--|--|--|--|--|--|--|--|--|--|--|--|--|--|--|--|--|--|--|--|--|--|--|--|--|--|--|--|--|--|--|--|--|--|--|--|--|--|--|--|--|--|--|--|--|--|--|--|--|--|--|--|--|--|--|--|--|--|--|--|--|--|--|--|--|--|--|--|--|--|--|--|--|--|--|--|--|--|--|--|--|--|--|--|--|--|--|--|--|--|--|--|--|--|--|--|--|--|--|--|--|--|--|--|--|--|--|--|--|--|--|--|--|--|--|--|--|--|--|--|--|--|--|--|--|--|--|--|--|--|--|--|--|--|--|--|--|--|--|--|--|--|--|--|--|--|--|--|--|--|--|--|--|--|--|--|--|--|--|--|--|--|--|--|--|--|--|--|--|--|--|--|--|--|--|--|--|--|--|--|--|--|--|--|--|--|--|--|--|--|--|--|--|--|--|--|--|--|--|--|--|--|--|--|--|--|--|--|--|--|--|--|--|--|--|--|--|--|--|--|--|--|--|--|--|--|--|--|--|--|--|--|--|--|--|--|--|--|--|--|--|--|--|--|--|--|--|--|--|--|--|--|--|--|--|--|--|--|--|--|--|--|--|--|--|--|--|--|--|--|--|--|--|--|--|--|--|--|--|--|--|--|--|--|--|--|--|--|--|--|--|--|--|--|--|--|--|--|--|--|--|--|--|--|--|--|--|--|--|--|--|--|--|--|--|--|--|--|--|--|--|--|--|--|--|--|--|--|--|--|--|--|--|--|--|--|--|--|--|--|--|--|--|--|--|--|--|--|--|--|--|--|--|--|--|--|--|--|--|--|--|--|--|--|--|--|--|--|--|--|--|--|--|--|--|--|--|--|--|--|--|--|--|--|--|--|--|--|--|--|--|--|--|--|--|--|--|--|--|--|--|--|--|--|--|--|--|--|--|--|--|--|--|--|--|--|--|--|--|--|--|--|--|--|--|--|--|--|--|--|--|--|--|--|--|--|--|--|--|--|--|--|--|--|--|--|--|--|--|--|--|--|--|--|--|--|--|--|--|--|--|--|--|--|--|--|--|--|--|--|--|--|--|--|--|--|--|--|--|--|--|--|--|--|--|--|--|--|--|--|--|--|--|--|--|--|--|--|--|--|--|--|--|--|--|--|--|--|--|--|--|--|--|--|--|--|--|--|--|--|--|--|--|--|--|--|--|--|--|--|--|--|--|--|--|--|--|--|--|--|--|--|--|--|--|--|--|--|--|--|--|--|--|--|--|--|--|--|--|--|--|--|--|--|--|--|--|--|--|--|--|--|--|--|--|--|--|--|--|--|--|--|--|--|--|--|--|--|--|--|--|--|--|--|--|--|--|--|--|--|--|--|--|--|--|--|--|--|--|--|--|--|--|--|--|--|--|--|--|--|--|--|--|--|--|--|--|--|--|--|--|--|--|--|--|--|--|--|--|--|--|--|--|--|--|--|--|--|--|--|--|--|--|--|--|--|--|--|--|--|--|--|--|--|--|--|--|--|--|--|--|--|--|--|--|--|--|--|--|--|--|--|--|--|--|--|--|--|--|--|--|--|--|--|--|--|--|--|--|--|--|--|--|--|--|--|--|--|--|--|--|--|--|--|--|--|--|--|--|--|--|--|--|--|--|--|--|--|--|--|--|--|--|--|--|--|--|--|--|--|--|--|--|--|--|--|--|--|--|--|--|--|--|--|--|--|--|--|--|--|--|--|--|--|--|--|--|--|--|--|--|--|--|--|--|--|--|--|--|--|--|--|--|--|--|--|--|--|--|--|--|--|--|--|--|--|--|--|--|--|--|--|--|--|--|--|--|--|--|--|--|--|--|--|--|--|--|--|--|--|--|--|--|--|--|--|--|--|--|--|--|--|--|--|--|--|--|--|--|--|--|--|--|--|--|--|--|--|--|--|--|--|--|--|--|--|--|--|--|--|--|--|--|--|--|--|--|--|--|--|--|--|--|--|--|--|--|--|--|--|--|--|--|--|--|--|--|--|--|--|--|--|--|--|--|--|--|--|--|--|--|--|--|--|--|--|--|--|--|--|--|--|--|--|--|--|--|--|--|--|--|--|--|--|--|--|--|--|--|--|--|--|--|--|--|--|--|--|--|--|--|--|--|--|--|--|--|--|--|--|--|--|--|--|--|--|--|--|--|--|--|--|--|--|--|--|--|--|--|--|--|--|--|--|--|--|--|--|--|--|--|--|--|--|--|--|--|--|--|--|--|--|--|--|--|--|--|--|--|--|--|--|--|--|--|--|--|--|--|--|--|--|--|--|--|--|--|--|--|--|--|--|--|--|--|--|--|--|--|--|--|--|--|--|--|--|--|--|--|--|--|--|--|--|--|--|--|--|--|--|

|          |                                                                        |                     |        |     |
|----------|------------------------------------------------------------------------|---------------------|--------|-----|
| AhHMA5.1 | GSEALSCIVRLVESAQAKAFVORFDRISKYFVPLVILLISFSFWLSNFLARFHAEPDSWIPS....SMDS | ELALQF              | 276    |     |
| AhHMA5.5 | GSEALSCIVRLVESAQAKAFVOKFDRISKYFVPLVILLISFSFWLSNFLARFHAEPESWIPS....SMDS | ELALQF              | 276    |     |
| AhHMA5.6 | GSEALSCIVRLVESAQAKAFVOKLADHSKYFVPLVILLISFSFWIANYLAKLHAYPKSWIPS....SMNS | ELALQF              | 270    |     |
| AhHMA5.2 | GSEALSCIVRLVESAQAKAFVOKLADHSKYFVPLVILLISFSFWIANYLAKLHAYPKSWIPS....SMNS | ELALQF              | 270    |     |
| AhHMA5.7 | GSDALSCIVQLVETAQAKAFVOKLADHSRVFVPLVVVAFLFWMGNFVPEVGLPRHWIK....AMNA     | ELALQF              | 276    |     |
| AhHMA5.3 | GSDALSCIVQLVETAQAKAFVOKLADHSRVFVPLVVVAFLFWMGNFVPEVGLPRHWIK....AMNA     | ELALQF              | 276    |     |
| AhHMA7.2 | GSDVLSQIISLVETAQSKAPIQKFADYASIFVPTVVSALLTFFSNYGASIGAPPEEWLPE....NGNH   | VFALMF              | 274    |     |
| AhHMA7.3 | GSDVLSQIISLVETAQSKAPIQKFADYASIFVPTVVSALLTFFSNYGASIGAPPEEWLPE....NGNH   | VFALMF              | 274    |     |
| AhHMA7.5 | GSDVLSQIISLVETAQSKAPIQKFADYASIFVPTVVSALLTFFSNYGASVVGAPPEEWLPE....NGNH  | VFALMF              | 274    |     |
| AhHMA7.4 | GSDVLSQIISLVETAQSKAPIQKFADYASIFVPTVVALSLLTFLCYTA                       | ALEAPKEWLPE....NGNH | VFALMF | 272 |
| AhHMA7.1 | GSDVLSQIISLVETAQSKAPIQKFADYASIFVPTVVALSLLTFLCYTA                       | ALEAPKEWLPE....NGNH | VFALMF | 274 |

|          |                    |               |              |            |             |             |              |       |   |     |  |
|----------|--------------------|---------------|--------------|------------|-------------|-------------|--------------|-------|---|-----|--|
|          |                    |               | *            | 340        | *           | 360         | *            | 380   | * | 400 |  |
| AhHMA1.1 | ALGLMVAASPCALAVA   | PLAYATAISSCAR | KARK         | GILLKGGHVL | DALASCHTIA  | FDKTGTLTGGL | FKAIEPIYGHNV | RKNE  |   | 332 |  |
| AhHMA1.2 | ALGLMVAASPCALAVA   | PLAYATAISSCAR | KARK         | GILLKGGHVL | DALASCHTIA  | FDKTGTLTGGL | FKAIEPIYGHNV | RKNE  |   | 332 |  |
| AhHMA3.1 | ALVVLVSACPCALILSTP | WATFCAYTKAATS | GGLIKGGDYLE  | TLAKIKVMAF | DKTGTTIKGEF | VTNFVSL     | .....        |       |   | 300 |  |
| AhHMA3.2 | ALVVLVSACPCALILSTP | WATFCAYTKAATS | GGLIKGGDYLE  | TLAKIKVMAF | DKTGTTIKGEF | VTNFVSL     | .....        |       |   | 300 |  |
| AhHMA8.1 | AVDVLVSCPCALILATP  | AVLVGSLGARKG  | LLIRGGDVLER  | LASINYLAL  | DKTGTLTKGP  | VSLVSSI     | .....        |       |   | 346 |  |
| AhHMA8.2 | AVDVLVSCPCALILATP  | AVLVGSLGARKG  | LLIRGGDVLER  | LASINYLAL  | DKTGTLTKGP  | VSLVSSI     | .....        |       |   | 323 |  |
| AhHMA6.2 | ACSVLVACPCALILATP  | AVLVGSLGATR   | GLLRGGNILE   | KFAMVDTV   | FDKTGTLTVGR | PVTKV       | .....        |       |   | 327 |  |
| AhHMA6.1 | ACSVLVACPCALILATP  | AVLVGSLGATR   | GLLRGGNILE   | KFAMVDTV   | FDKTGTLTVGR | PVTKV       | .....        |       |   | 362 |  |
| AhHMA5.4 | GISVMVACPCALILATP  | AVMVGTGVGAS   | QGVLIKGGQAL  | SAHKVNCI   | FDKTGTLTVGK | PVNTKLT     | .....        |       |   | 348 |  |
| AhHMA5.8 | GISVMVACPCALILATP  | AVMVGTGVGAS   | QGVLIKGGQAL  | SAHKVNCI   | FDKTGTLTVGK | PVNTKLT     | .....        |       |   | 348 |  |
| AhHMA5.1 | GISVMVACPCALILATP  | AVMVGTGVGAS   | QGVLIKGGQAL  | SAHKVNCI   | FDKTGTLTVGK | PVNTKLLT    | .....        |       |   | 348 |  |
| AhHMA5.5 | GISVMVACPCALILATP  | AVMVGTGVGAS   | QGVLIKGGQAL  | SAHKVNCI   | FDKTGTLTVGK | PVNTKLLT    | .....        |       |   | 348 |  |
| AhHMA5.6 | GISVMVACPCALILATP  | AVMVGTGVGAT   | QGVLIKGGQAL  | SAHKVNCI   | FDKTGTLTVGK | PVNTKLFK    | .....        |       |   | 342 |  |
| AhHMA5.2 | GISVMVACPCALILATP  | AVMVGTGVGAT   | QGVLIKGGQAL  | SAHKVNCI   | FDKTGTLTVGK | PVNTKLFK    | .....        |       |   | 342 |  |
| AhHMA5.7 | ATSVLVACPCALILATP  | AVMVASGMCAS   | QGVLIKGGDALE | KAHKVKV    | FDKTGTLTVG  | EPVVSALV    | .....        |       |   | 348 |  |
| AhHMA5.3 | ATSVLVACPCALILATP  | AVMVASGMCAS   | QGVLIKGGDALE | KAHKVKV    | FDKTGTLTVG  | EPVVSALV    | .....        |       |   | 348 |  |
| AhHMA7.2 | STAVVVACPCALILATP  | AVMVATGVGANN  | GVLIKGGDAL   | ERAQMVKY   | FDKTGTLTQ   | QASVTTAKT   | FTT          | ..... |   | 346 |  |
| AhHMA7.3 | STAVVVACPCALILATP  | AVMVATGVGANN  | GVLIKGGDAL   | ERAQMVKY   | FDKTGTLTQ   | QASVTTAKT   | FTT          | ..... |   | 346 |  |
| AhHMA7.5 | STAVVVACPCALILATP  | AVMVATGVGANN  | GVLIKGGDAL   | ERAQMVKY   | FDKTGTLTQ   | QASVTTAKT   | FTT          | ..... |   | 346 |  |
| AhHMA7.4 | STAVVVACPCALILATP  | AVMVATGVGANN  | GVLIKGGDAL   | ERAQMVKY   | FDKTGTLTQ   | QATVTTVK    | VFT          | ..... |   | 344 |  |
| AhHMA7.1 | STAVVVACPCALILATP  | AVMVATGVGANN  | GVLIKGGDAL   | ERAQMVKY   | FDKTGTLTQ   | QATVTTVK    | VFT          | ..... |   | 346 |  |

|          |                   |                 |             |            |         |           |                  |       |       |       |      |     |
|----------|-------------------|-----------------|-------------|------------|---------|-----------|------------------|-------|-------|-------|------|-----|
|          |                   | *               | 420         | *          | 440     | *         | 460              | *     | 480   |       |      |     |
| AhHMA1.1 | SNISSCRIPTCEKEALA | VAAAME          | .....       | KGTHHIGRA  | VVDHSE  | GKD       | .....            | LP    | ..... | SVSV  | 380  |     |
| AhHMA1.2 | SNISSCRIPTCEKEALA | VAAAME          | .....       | KGTHHIGRA  | VVDHSE  | GKD       | .....            | LP    | ..... | SVSV  | 380  |     |
| AhHMA3.1 | .....             | DEIDLNTLLYWSSIE | .....       | SKSSHLLAA  | IVDYG   | SLS       | .....            | IEPN  | ..... | PENV  | 343  |     |
| AhHMA3.2 | .....             | DDIDLNTLLYWSSIE | .....       | SKSSHLLAA  | IVDYG   | SLS       | .....            | IEPN  | ..... | PENV  | 343  |     |
| AhHMA8.1 | .....             | NYGESEILOAAAVE  | .....       | KTASHHIA   | KAIINK  | ESLE      | .....            | LV    | ..... | LPVT  | 386  |     |
| AhHMA8.2 | .....             | NYGESEILOAAAVE  | .....       | KTASHHIA   | KAIINK  | ESLE      | .....            | LV    | ..... | LPVT  | 363  |     |
| AhHMA6.2 | .....             | .....           | .....       | QANSSQAE   | .....   | .....     | .....            | ..... | ..... | ..... | 342  |     |
| AhHMA6.1 | .....             | .....           | .....       | QANSSQAE   | .....   | .....     | .....            | ..... | ..... | ..... | 377  |     |
| AhHMA5.4 | .....             | NMVLRFYELVAAAE  | .....       | VNSEHFLAK  | AVVEYAK | KFK       | .....            | DEEN  | ..... | PS    | 392  |     |
| AhHMA5.8 | .....             | NMALRFYELVAAAE  | .....       | ENSEHFLAK  | AVVEYAK | KFK       | .....            | DEEN  | ..... | PS    | 392  |     |
| AhHMA5.1 | .....             | NMVLQEFYELVAAAE | .....       | VNSEHFLAK  | AVEYAK  | KLR       | .....            | DEEN  | ..... | PA    | 392  |     |
| AhHMA5.5 | .....             | NMVLQEFYELVAAAE | .....       | VNSEHFLAK  | AVEYAK  | KLR       | .....            | DEEN  | ..... | PV    | 392  |     |
| AhHMA5.6 | .....             | NMSVQDFYEL      | .....       | ANSEHFIARA | IVEHAK  | II        | TEDEQN           | ..... | HT    | ..... | WPEV | 383 |
| AhHMA5.2 | .....             | NMSVQDFYELVAAAE | ASLLLLLNTTL | VNSEHFIARA | IVEHAK  | II        | TEDEQN           | ..... | HT    | ..... | WPEV | 399 |
| AhHMA5.7 | .....             | EFTMEEFYDNTIAVE | .....       | SSSEHFLAK  | AVVKHAK | LRKKFGS   | NDEE             | ..... | ..... | ..... | VPDV | 395 |
| AhHMA5.3 | .....             | DFTMEEFYDNTIAVE | .....       | SSSEHFLAK  | AVVKHAK | LRKKFGS   | NDEE             | ..... | ..... | ..... | VPDV | 395 |
| AhHMA7.2 | .....             | GMQRGEFLRLVASAE | .....       | ASSEHFLAK  | AVEYAR  | HFHFFDSS  | ASDGTQNGAKELKSGW | LF    | FDV   | ..... | 406  |     |
| AhHMA7.3 | .....             | GMQRGEFLRLVASAE | .....       | ASSEHFLAK  | AVEYAR  | HFHFFDSS  | ASDGTQNGAKELKSGW | LF    | FDV   | ..... | 406  |     |
| AhHMA7.5 | .....             | GMQRGEFLRLVASAE | .....       | ASSEHFLAK  | AVEYAR  | HFHFFDSS  | ASNGAQNGAKELKSGW | LF    | FDV   | ..... | 406  |     |
| AhHMA7.4 | .....             | GMRGEFLTLVASAE  | .....       | ASSEHFLGK  | AILQYAR | HFHFFDESS | TTNGTLNDAKELSSGW | LD    | HDV   | ..... | 404  |     |
| AhHMA7.1 | .....             | GMRGEFLTLVASAE  | .....       | ASSEHFLGK  | AILQYAR | HFHFFDESS | TTNGTLNDAKELSSGW | LD    | HDV   | ..... | 406  |     |

|          |              |                |            |           |       |         |           |                 |             |         |           |       |            |            |       |     |
|----------|--------------|----------------|------------|-----------|-------|---------|-----------|-----------------|-------------|---------|-----------|-------|------------|------------|-------|-----|
|          |              | *              | 500        | *         | 520   | *       | 540       | *               | 560         |         |           |       |            |            |       |     |
| AhHMA1.1 | ES           | EYFPCRGLIATVNS | IESGTSAK   | LLKA      | ....  | SLGSVDF | TSFCHSEES | KIKEAVNTSSYGSEF | HAALSVNKKVT | 456     |           |       |            |            |       |     |
| AhHMA1.2 | ES           | EYFPCRGLIATVNS | IESGTSAK   | LLKA      | ....  | SLGSVDF | TSFCHSEES | KIKEAVNTSSYGSEF | HAALSVNKKVT | 456     |           |       |            |            |       |     |
| AhHMA3.1 | TE           | ENFPCEGTYGKIEE | LVYGNKK    | IA        | ..... | TRAGS   | TVPAMRGQI | .....           | GKTTGYLYCG  | ATPVG   | 401       |       |            |            |       |     |
| AhHMA3.2 | TE           | ENFPCEGTYGKIEE | LVYGNKK    | IA        | ..... | TRAGS   | TVPAMHGQI | .....           | GKTTGYLYCG  | ATPVG   | 401       |       |            |            |       |     |
| AhHMA8.1 | QGQLVEPCFGTL | LAIDGLVAGS     | LEWHDRFQIK | MNP       | SDLN  | ....    | EHTLMNHSS | TS              | SNY         | SKTVVVG | GREGEGIG  | 461   |            |            |       |     |
| AhHMA8.2 | QGQLVEPCFGTL | LAIDGLVAGS     | LEWHDRFQIK | MNP       | SDLN  | ....    | EHTLMNHSS | TS              | SNY         | SKTVVVG | GREEGEGIG | 438   |            |            |       |     |
| AhHMA6.2 | .....        | .....          | .....      | ENTWSDVEV | ..... | .....   | RHGVSSKH  | OELED           | FKNQSVVVG   | GVN     | DTAG      | 383   |            |            |       |     |
| AhHMA6.1 | .....        | .....          | .....      | ENTWSDVEV | ..... | .....   | RHGVSSKH  | OELED           | FKNQSVVVG   | GVN     | DTAG      | 418   |            |            |       |     |
| AhHMA5.4 | QD           | VSITCHGVKATVRN | QET        | INGN      | KSLMT | .....   | SHSIA     | .....           | PSDA        | DI      | AAEAM     | ..... | AQTGILVSIN | REVIG      | 456   |     |
| AhHMA5.8 | QD           | VSITCHGVKATVRN | QET        | INGN      | KSLMT | .....   | SHSIA     | .....           | PSDA        | DI      | AAEAM     | ..... | AQTGILVSIN | REVIG      | 456   |     |
| AhHMA5.1 | RD           | VSITCHGVKATVRN | QET        | INGN      | KSLMT | .....   | EHN       | VV              | .....       | PADA    | DI        | AAEAM | .....      | AQTGILVSIS | GEVVG | 456 |
| AhHMA5.5 | RD           | VSITCHGVKATVRN | QET        | INGN      | KSLMT | .....   | EHN       | VV              | .....       | PADA    | DI        | AAEAM | .....      | AQTGILVSIS | GEVVG | 456 |
| AhHMA5.6 | RD           | VSISCHGVKAIVQN | ET         | LAGN      | KKLM  | .....   | DHNTA     | .....           | SVDA        | EV      | AAERL     | ..... | AQTGILVSLD | GETAG      | 447   |     |
| AhHMA5.2 | RD           | VSISCHGVKAIVQN | ET         | LAGN      | KKLM  | .....   | DHNTA     | .....           | SVDA        | EV      | AAERL     | ..... | AQTGILVSLD | GETAG      | 463   |     |
| AhHMA5.7 | KD           | EVQVCGAGVCGKVG | ET         | LVGN      | KRLH  | .....   | ACNVP     | .....           | SSE         | VERY    | SENEIL    | ..... | ARTCVLVSID | GKTAG      | 459   |     |
| AhHMA5.3 | KD           | EVQVCGAGVCGKVG | ET         | LVGN      | KRLH  | .....   | ACNVP     | .....           | SSE         | VERY    | SENEIL    | ..... | ARTCVLVSID | GKTAG      | 459   |     |
| AhHMA7.2 | SD           | IALPGRGVQC     | LIDG       | PILVGN    | RKLMA | .....   | ESGID     | .....           | SDE         | VNFV    | VELES     | ..... | ARTGVVAYD  | DIITIG     | 470   |     |
| AhHMA7.3 | SD           | IALPGRGVQC     | LIDG       | PILVGN    | RKLMA | .....   | ESGID     | .....           | SDE         | VNFV    | VELES     | ..... | ARTGVVAYD  | DIITIG     | 470   |     |
| AhHMA7.5 | SD           | IALPGRGVQC     | LIDG       | PILVGN    | RKLMA | .....   | ESGID     | .....           | SDE         | VNFV    | VELES     | ..... | ARTGVVAYD  | GIVIG      | 470   |     |
| AhHMA7.4 | SD           | IALPGRGVQC     | LIDG       | PILVGN    | RKLMA | .....   | ENGID     | .....           | STE         | VNFV    | VELES     | ..... | AKTGILVAYD | DVLITG     | 468   |     |
| AhHMA7.1 | SD           | IALPGRGVQC     | LIDG       | PILVGN    | RKLMA | .....   | ENGID     | .....           | STE         | VNFV    | VELES     | ..... | AKTGILVAYD | DVLITG     | 470   |     |

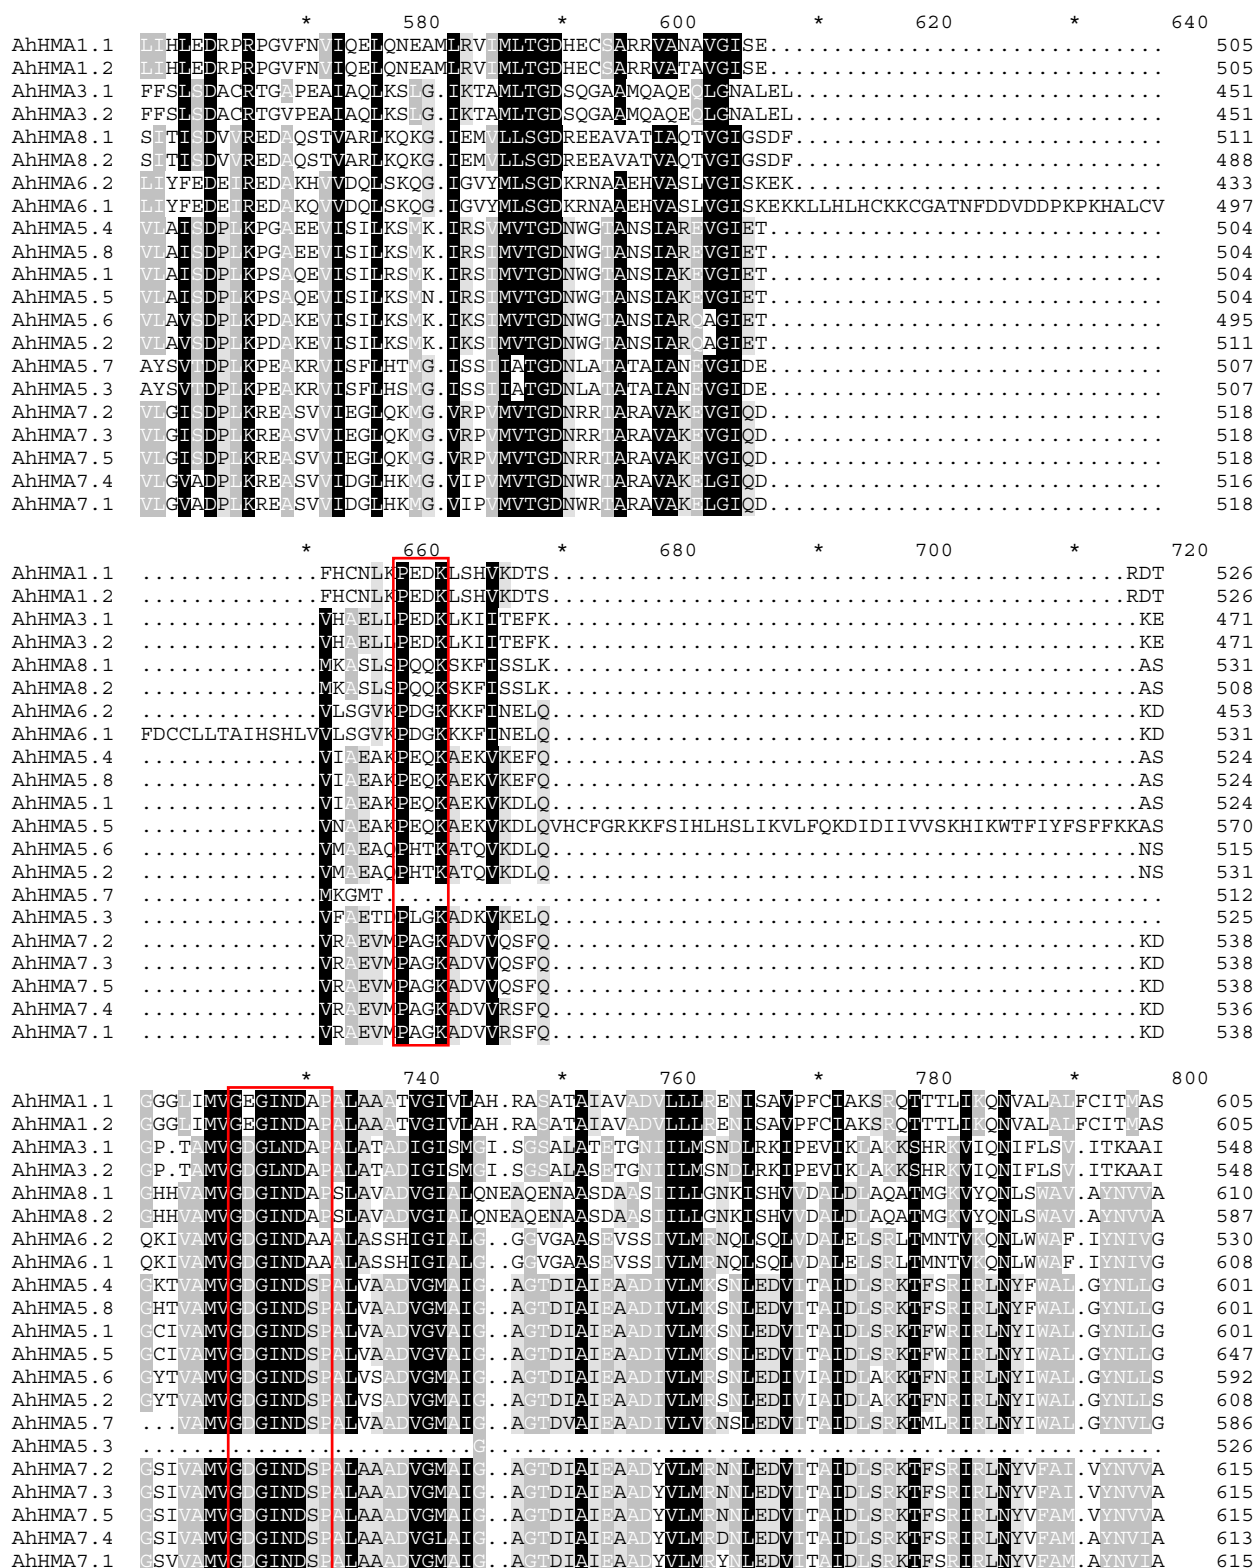

**Figure S2.** Complete multiple sequence alignment of the 21 AhHMA proteins using MAFFT (v. 7) with the default settings. Identical residues are highlighted in black and homologous residues in gray, while the typical conserved amino acid residues such as TGE, CPC/SPC, DKTGTLT, HP, PxxK, and GDGxNDxP are highlighted in red lines.



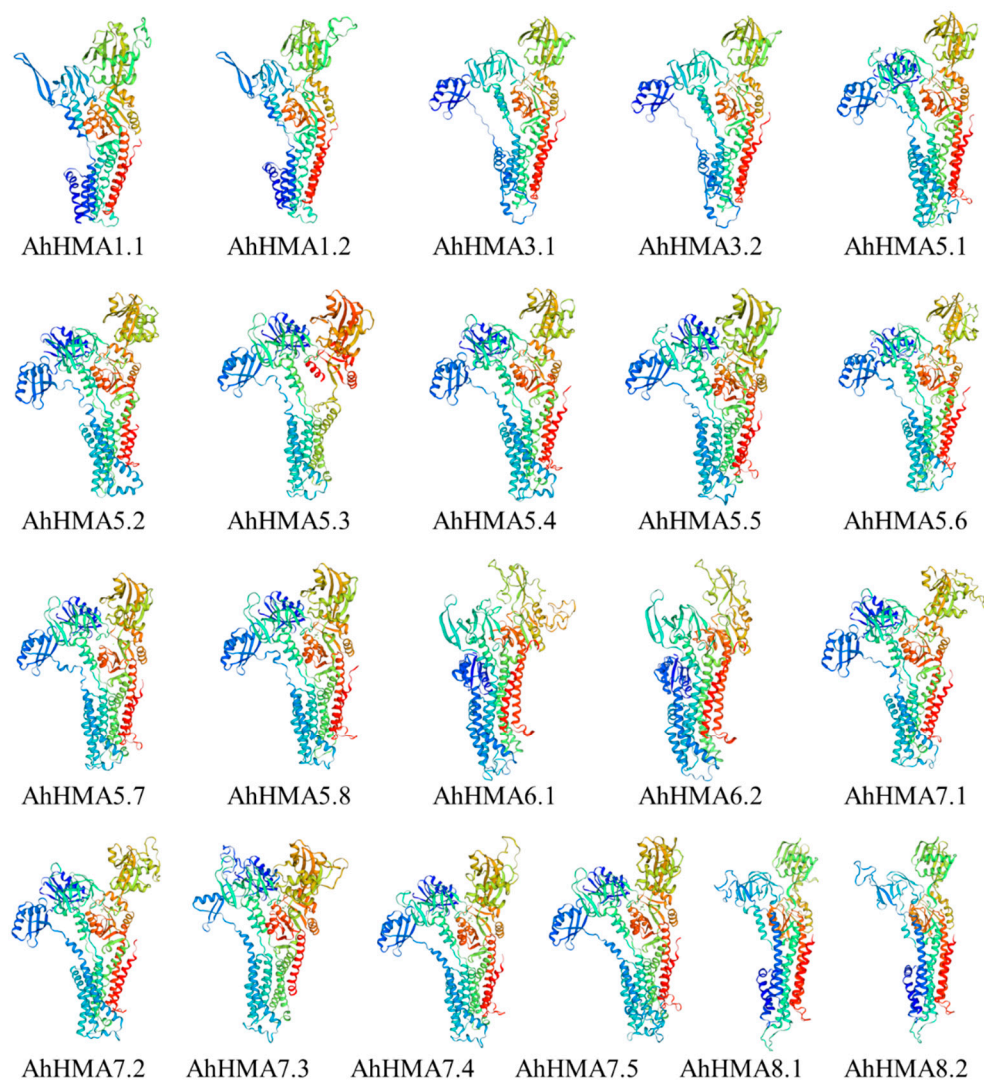

**Figure S3.** Predicted 3D structure of peanut AhHMA proteins by SwissModel. Models were visualized by rainbow color from N to C terminus.
